# Supplementary material
Source: Springer Nature journal article supplement (https://www.springermedizin.de/resource/supplementary/12967_2011_790_MOESM10_ESM.pdf/9577064)

A) Neutralization of WSN-WT virus

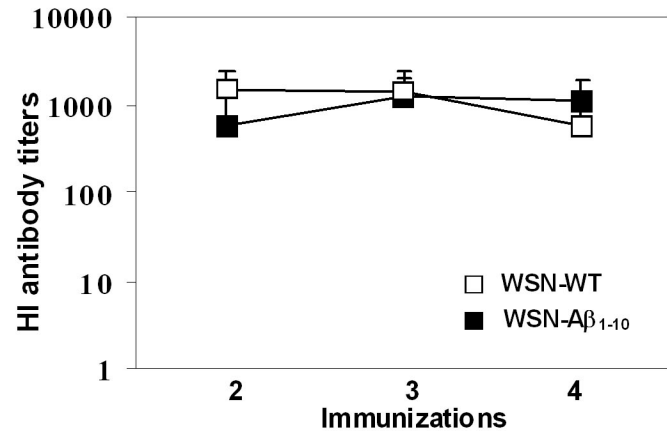

B) Neutralization of WSN-A $\beta_{1-10}$  virus

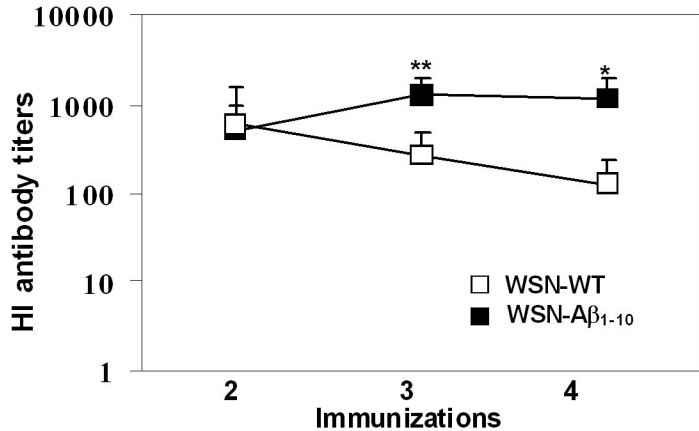

Supplement: MOESM10 [file 9577064]
